# Supplementary material
Source: PubMed Central journal article supplement (PMC8903195)
Supplement: mmc1.pdf [file mmc1.pdf]

**Supplemental information**

**The RNA helicase DHX16 recognizes specific  
viral RNA to trigger RIG-I-dependent  
innate antiviral immunity**

**Adam Hage, Preeti Bharaj, Sarah van Tol, Maria I. Giraldo, Maria Gonzalez-Orozco, Karl M. Valerdi, Abbey N. Warren, Leopoldo Aguilera-Aguirre, Xuping Xie, Steven G. Widen, Hong M. Moulton, Benhur Lee, Jeffrey R. Johnson, Nevan J. Krogan, Adolfo García-Sastre, Pei-Yong Shi, Alexander N. Freiberg, and Ricardo Rajsbaum**

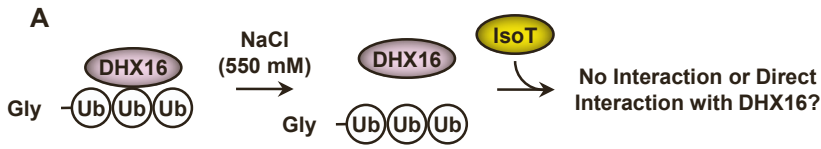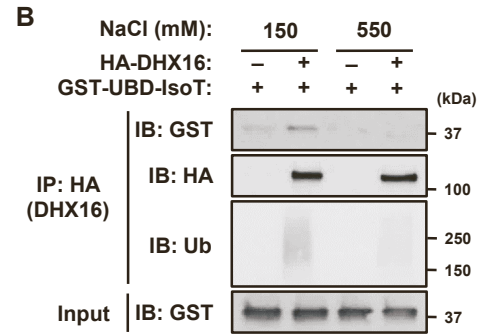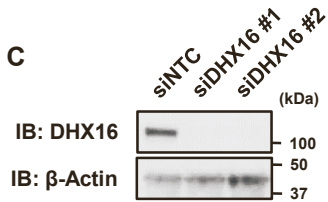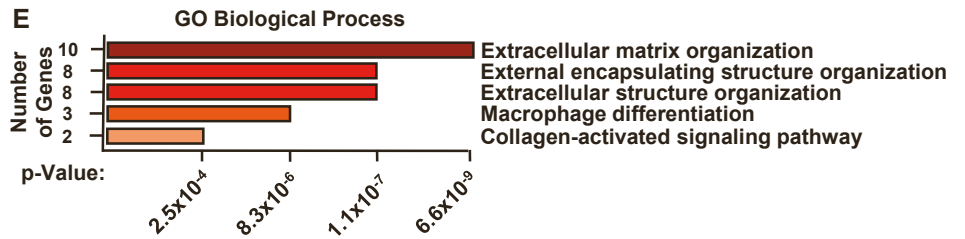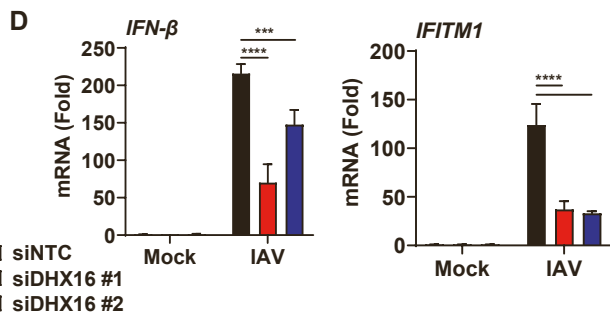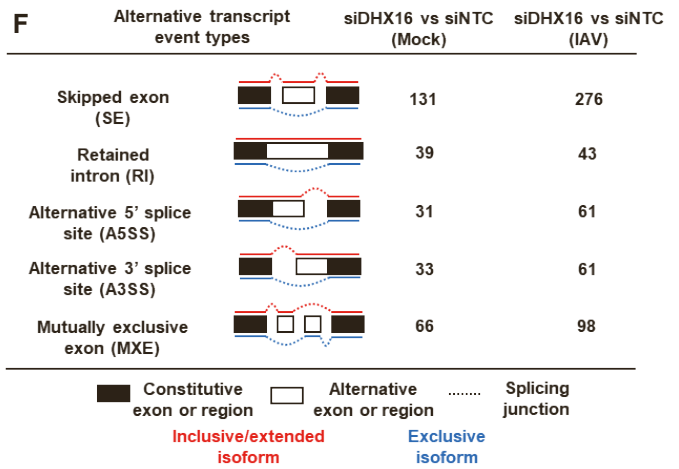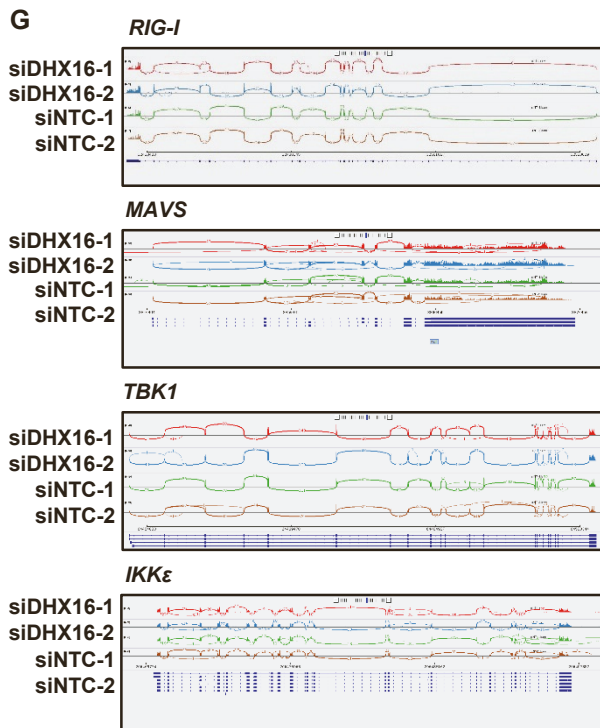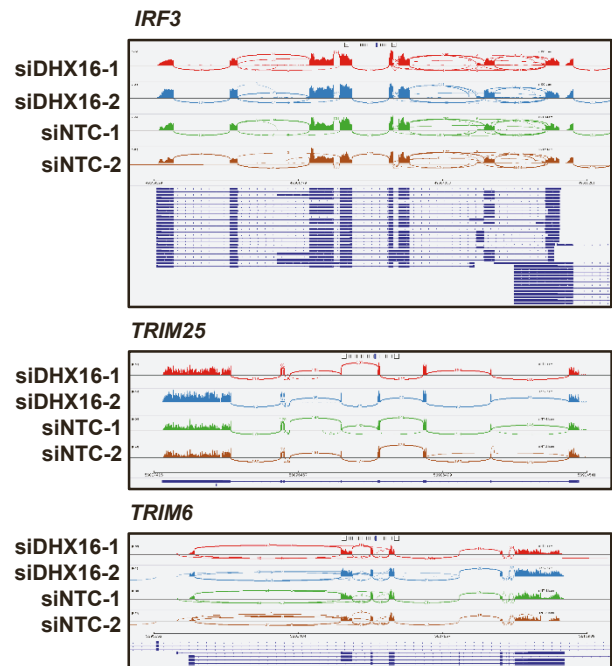

**Figure S1. DHX16 knockdown does not alter splicing of IFN-I pathway genes. Related to Figures 1 and 2.** (A) Representation of the denaturing Co-IP assay used to determine if IsoT interacts with DHX16 directly or indirectly via unanchored Ub. (B) GST-UBD-IsoT interacts with DHX16 *in vitro* via unanchored Ub after normal ionic strength (150 mM NaCl), but not high ionic strength (550 mM NaCl), RIPA washes (denaturing Co-IP). (C) Individual siRNA silencing efficiency of DHX16 protein expression (immunoblot). (D) *IFN- $\beta$*  and *IFITM1* expression from siNTC or individual siDHX16 treated A549s stimulated with IAV for 24 hrs (PR8 MOI=0.1) (qRT-PCR). (E) Enriched GO terms and pathways (Enrichr) of upregulated transcripts identified in the NGS heat map. (F) Number of alternative exons between siNTC and siDHX16 treated mock or IAV-infected A549s. (G) RNA-seq reads of human *RIG-I*, *MAVS*, *TBK1*, *IKK $\epsilon$* , *IRF3*, *TRIM25*, and *TRIM6* genes. Data are expressed as means (n=3) SD \*\*\*p < 0.001; \*\*\*\*p < 0.0001 (Two-way ANOVA with Dunnett's multiple comparisons). Data are representative of 2-3 independent experiments.

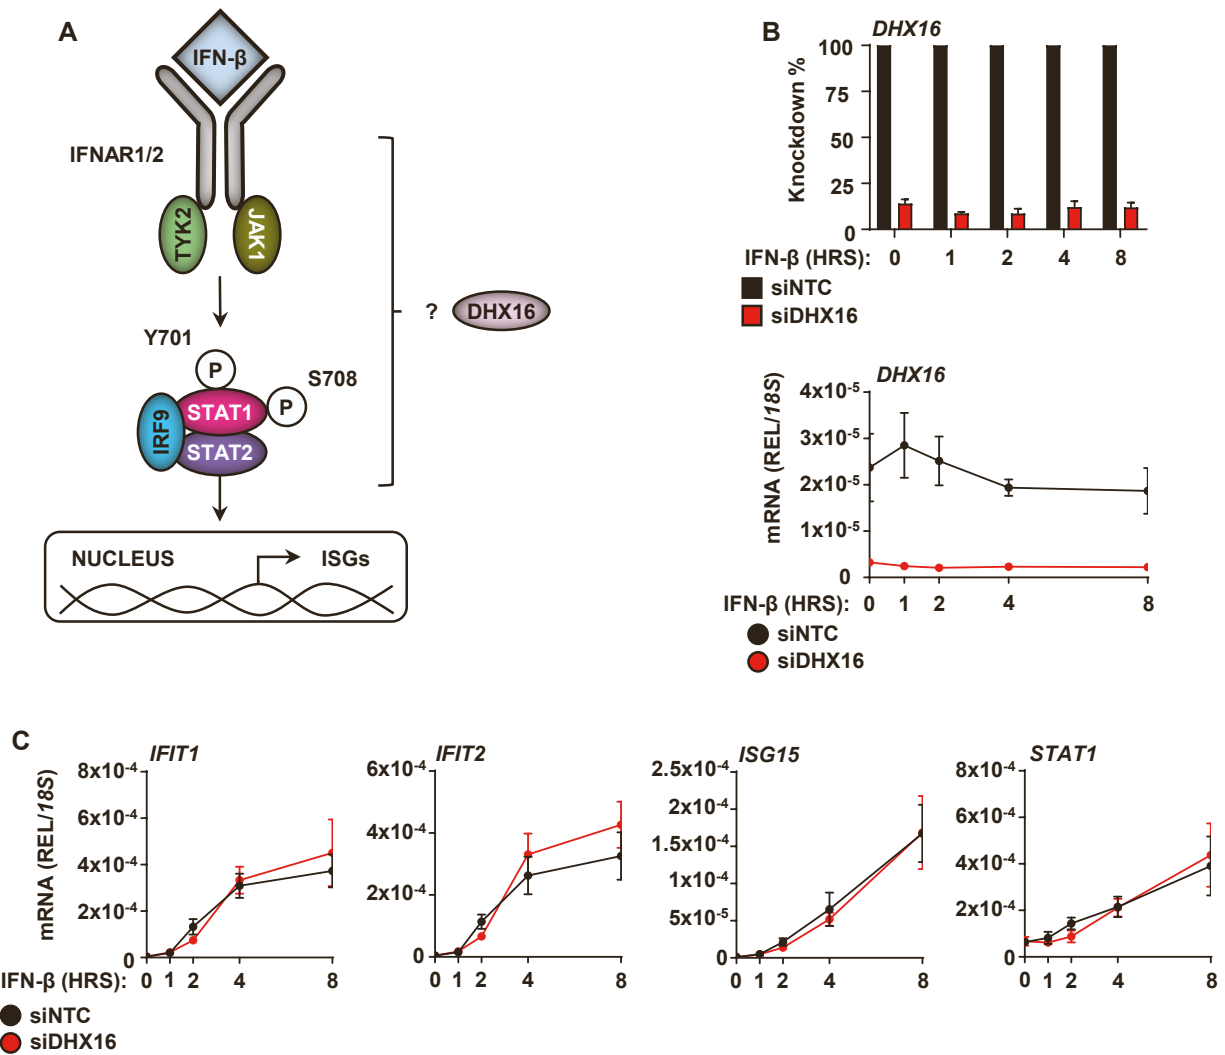

**Figure S2. DHX16 is not an IFN-stimulated gene. Related to Figure 3.** (A) Diagram of IFN-signaling pathway. (B) *DDX16* expression from siNTC or siDDX16 treated A549s stimulated with IFN- $\beta$  (1000 IU/mL) (qRT-PCR). (C) ISG expression from siNTC or siDDX16 treated A549s stimulated with IFN- $\beta$  (1000 IU/mL) (qRT-PCR). Data are expressed as means (n=3)  $\pm$  SD (Student's t-test). Data are representative of 2-3 independent experiments.

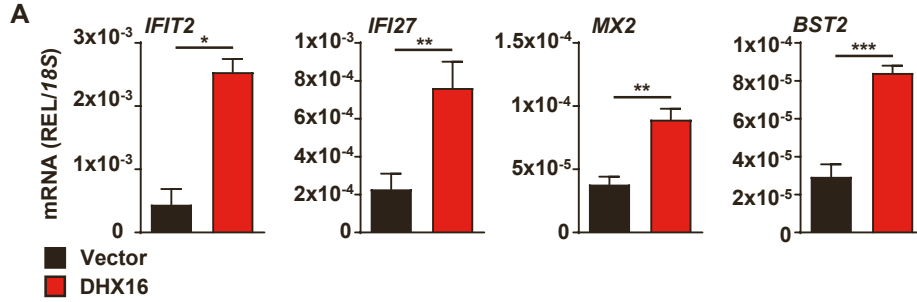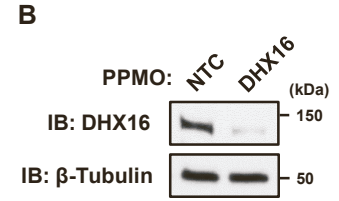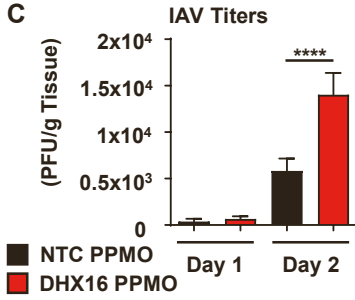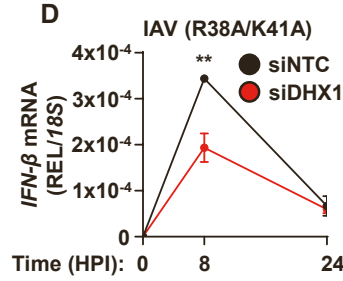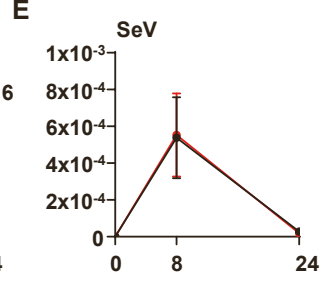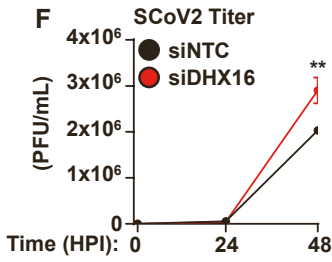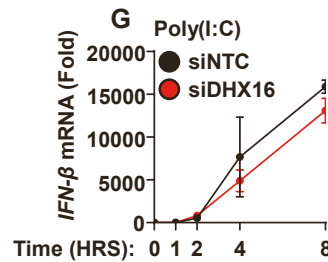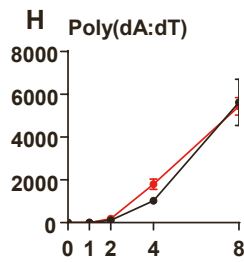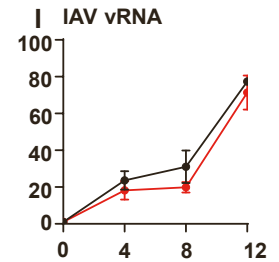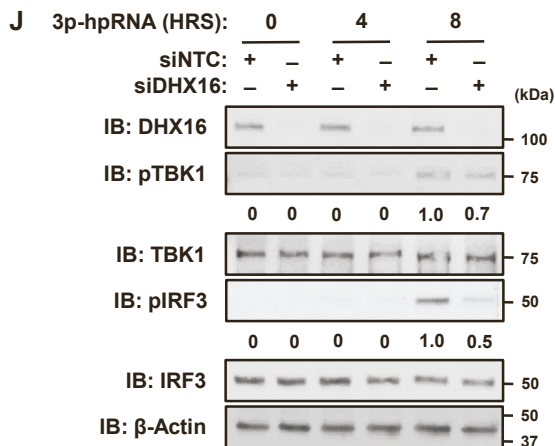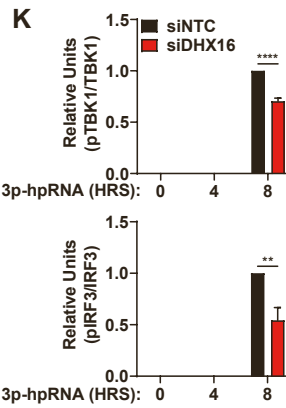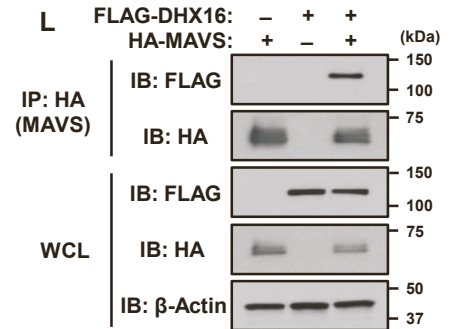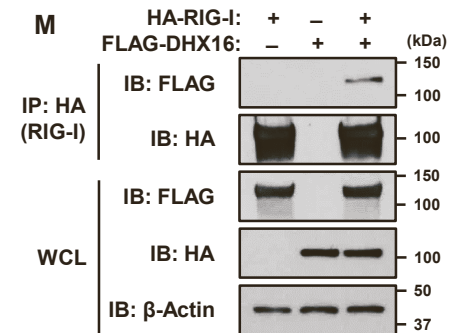

**Figure S3. DHX16 promotes the IFN-I production pathway. Related to Figure 3 and 4.** (A) *IFIT2*, *IFI27*, *Mx2*, and *BST2* expression from A549s transfected with DHX16 for 24 hrs (qRT-PCR). (B) Validation of PPMO-mediated silencing efficiency of DHX16 in MEFs (immunoblot). (C) Viral titers from NTC or DHX16 PPMO treated C57BL/6 mice infected with IAV (PR8 100 PFU) (n=3-4/group). (D and E) *IFN-β* expression from siNTC or siDHX16 treated A549s infected with IAV (PR8 R38A/K41A MOI=0.1) (D), or SeV (Cantell 100 HAU/mL) (E) (qRT-PCR). (F) Viral titers from siNTC or siDHX16 treated Calu-3s infected with SCoV2 (icSARS-CoV-2-mNG MOI=1). (G-I) *IFN-β* expression from siNTC or siDHX16 treated A549s transfected with Poly(I:C) HMW (10 μg/mL) (G), Poly(dA:dT) (10 μg/mL) (H), or IAV vRNA (100 ng/mL) (I) (qRT-PCR). (J) IFN-I production pathway activation from siNTC or siDHX16 treated A549s stimulated with 3p-hpRNA (100 ng/mL) (immunoblot). (K) Western blot quantification for pTBK1 and pIRF3 in (J) (densitometry). (L) Interaction between DHX16 and MAVS following co-expression in HEK293Ts (Co-IP). (M) Reciprocal interaction between DHX16 and RIG-I following co-expression in HEK293Ts (Co-IP). Data are expressed as means (n=3) SD \*p < 0.05; \*\*p < 0.01; \*\*\*p < 0.001; \*\*\*\*p < 0.0001 (Student's t-test or one-way ANOVA with Tukey's multiple comparisons). Data are representative of 2-3 independent experiments.

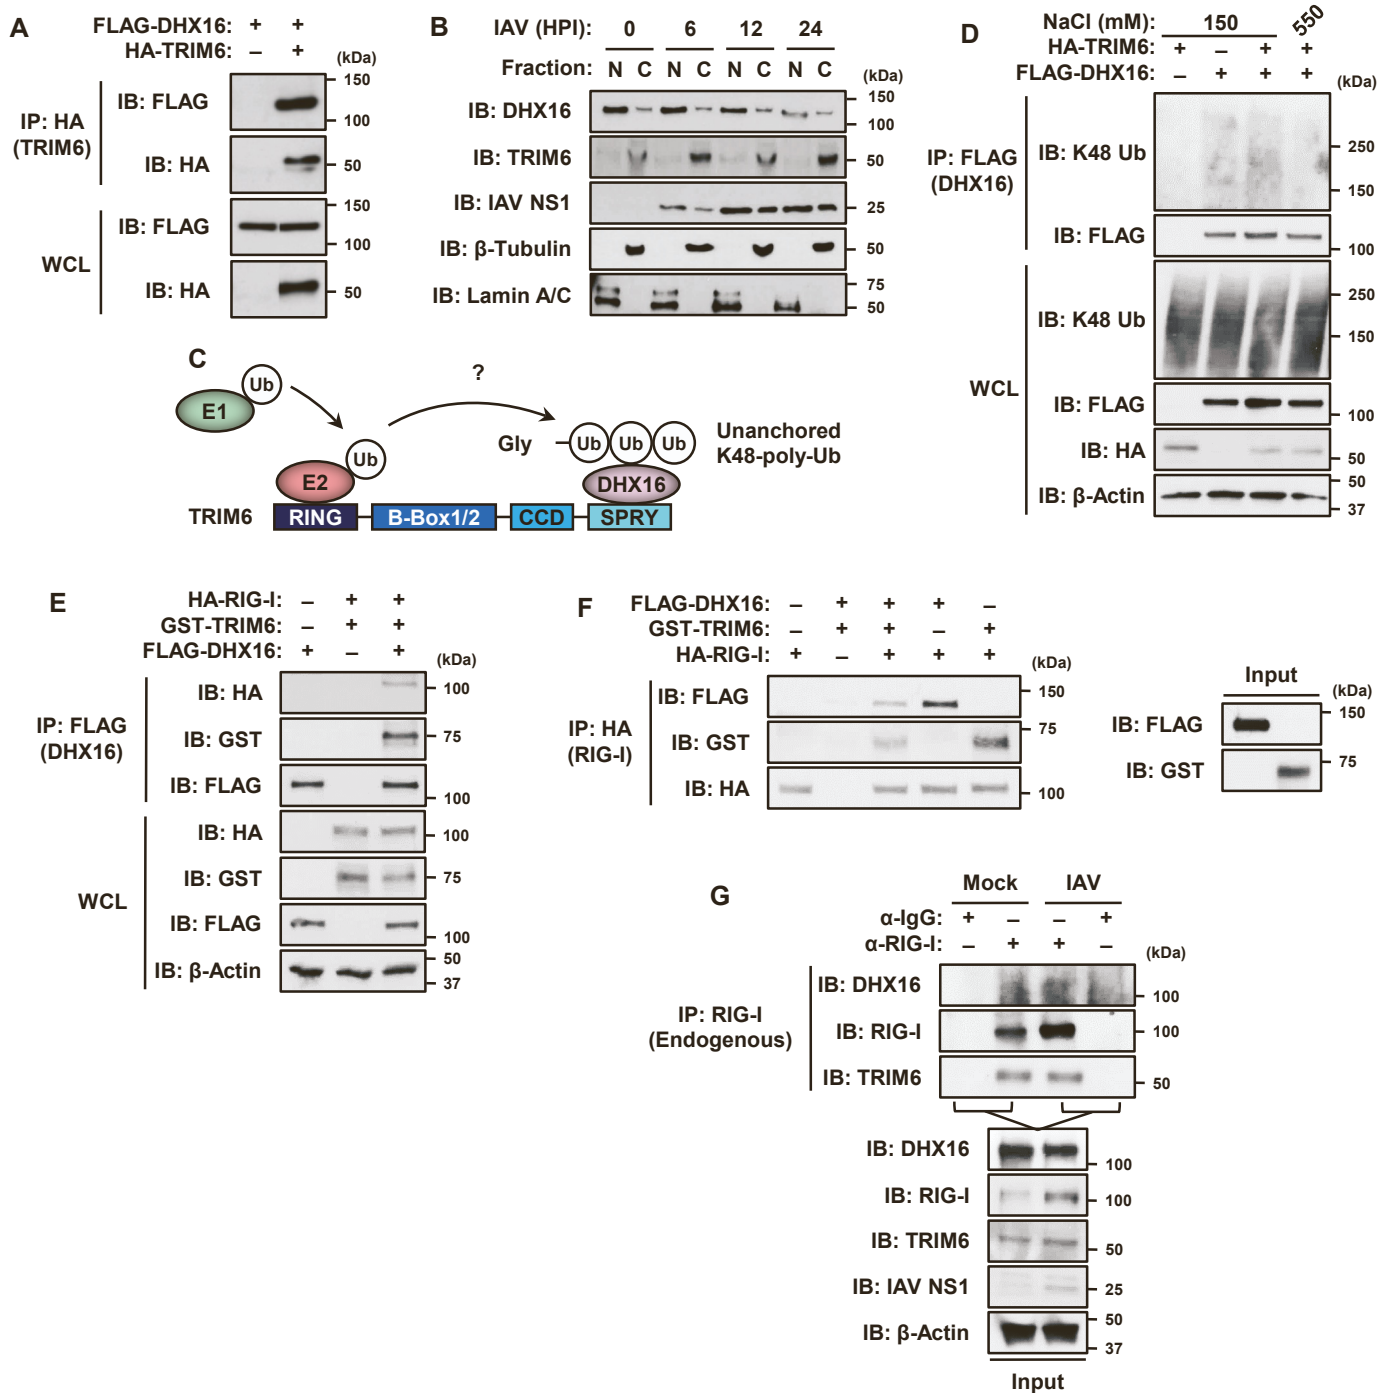

**Figure S4. DHX16 interacts with TRIM6. Related to Figure 6.** (A) Reciprocal interaction between DHX16 and TRIM6 following co-expression in HEK293Ts (Co-IP). (B) Nuclear and cytoplasmic distribution of DHX16 in mock and IAV infected A549s (PR8 MOI=1) (immunoblot). (C) Representation of RING and SPRY domain involvement in the TRIM6-mediated association of poly-Ub to targets. (D) Non-covalent interactions between DHX16 and K48-poly-Ub following co-expression with WT TRIM6 in low, but not high, salt washes in HEK293Ts (denaturing Co-IP). (E) Interaction between DHX16, RIG-I, and TRIM6 following co-expression in HEK293Ts (Co-IP). (F) Interaction between purified DHX16, RIG-I, and TRIM6 protein *in vitro* (Co-IP). (G) Interaction between endogenous DHX16, RIG-I, and TRIM6 in A549s infected with IAV for 24 hrs (PR8 MOI=1) (Co-IP). Data are representative of 2-3 independent experiments.

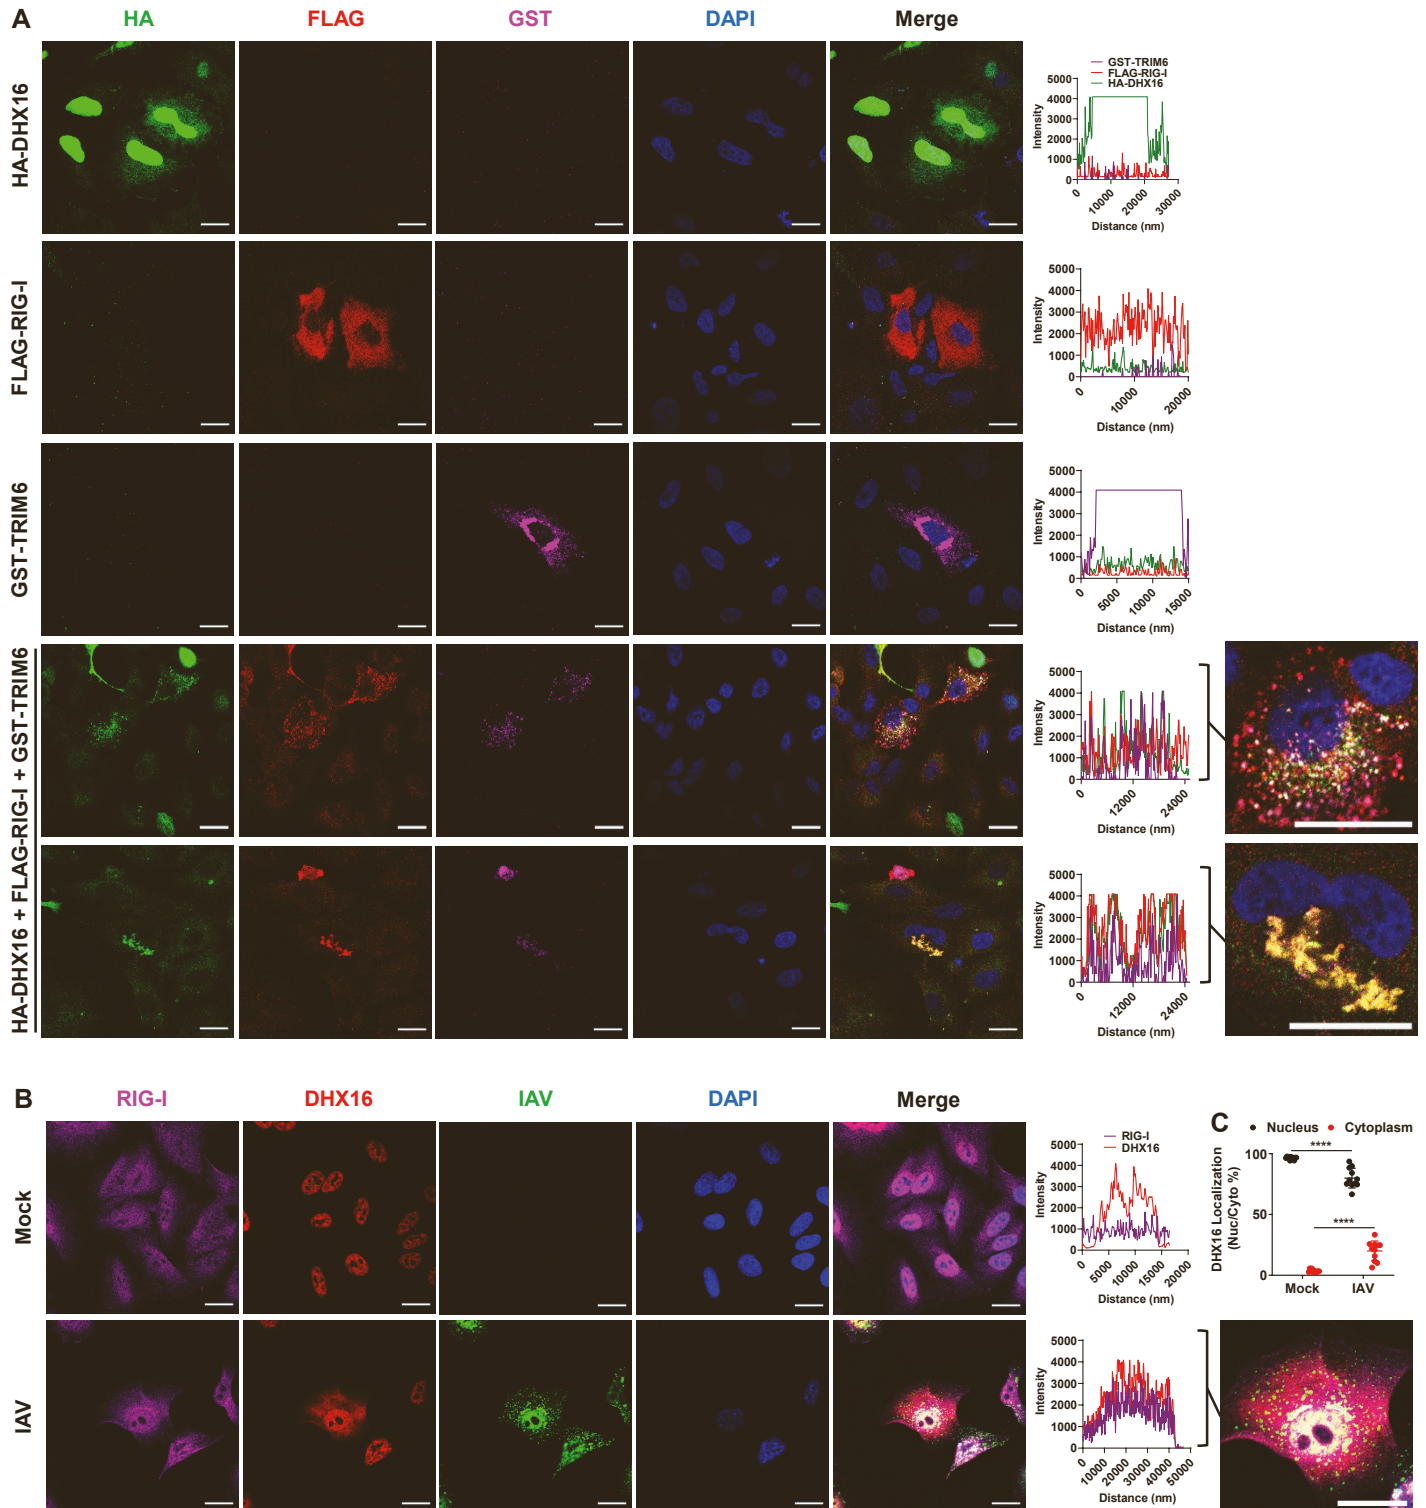

**Figure S5. DHX16 interacts with RIG-I and TRIM6 in the cytoplasm. Related to Figure 6. (A)** Co-localization between DHX16, RIG-I, and TRIM6 following co-expression in A549s. **(B)** Co-localization between DHX16 and RIG-I following IAV infection for 24 hrs in A549s (PR8 MOI=1). Scale bar=20  $\mu$ m (confocal microscopy). **(C)** Nuclear/cytoplasmic distribution of DHX16 following IAV infection for 24 hrs in A549s (PR8 MOI=1) (n=11). Data are expressed as means  $\pm$  SD \*\*\*\*p < 0.0001 (Two-way ANOVA with Tukey's multiple comparisons). Data are representative of 2-3 independent experiments.



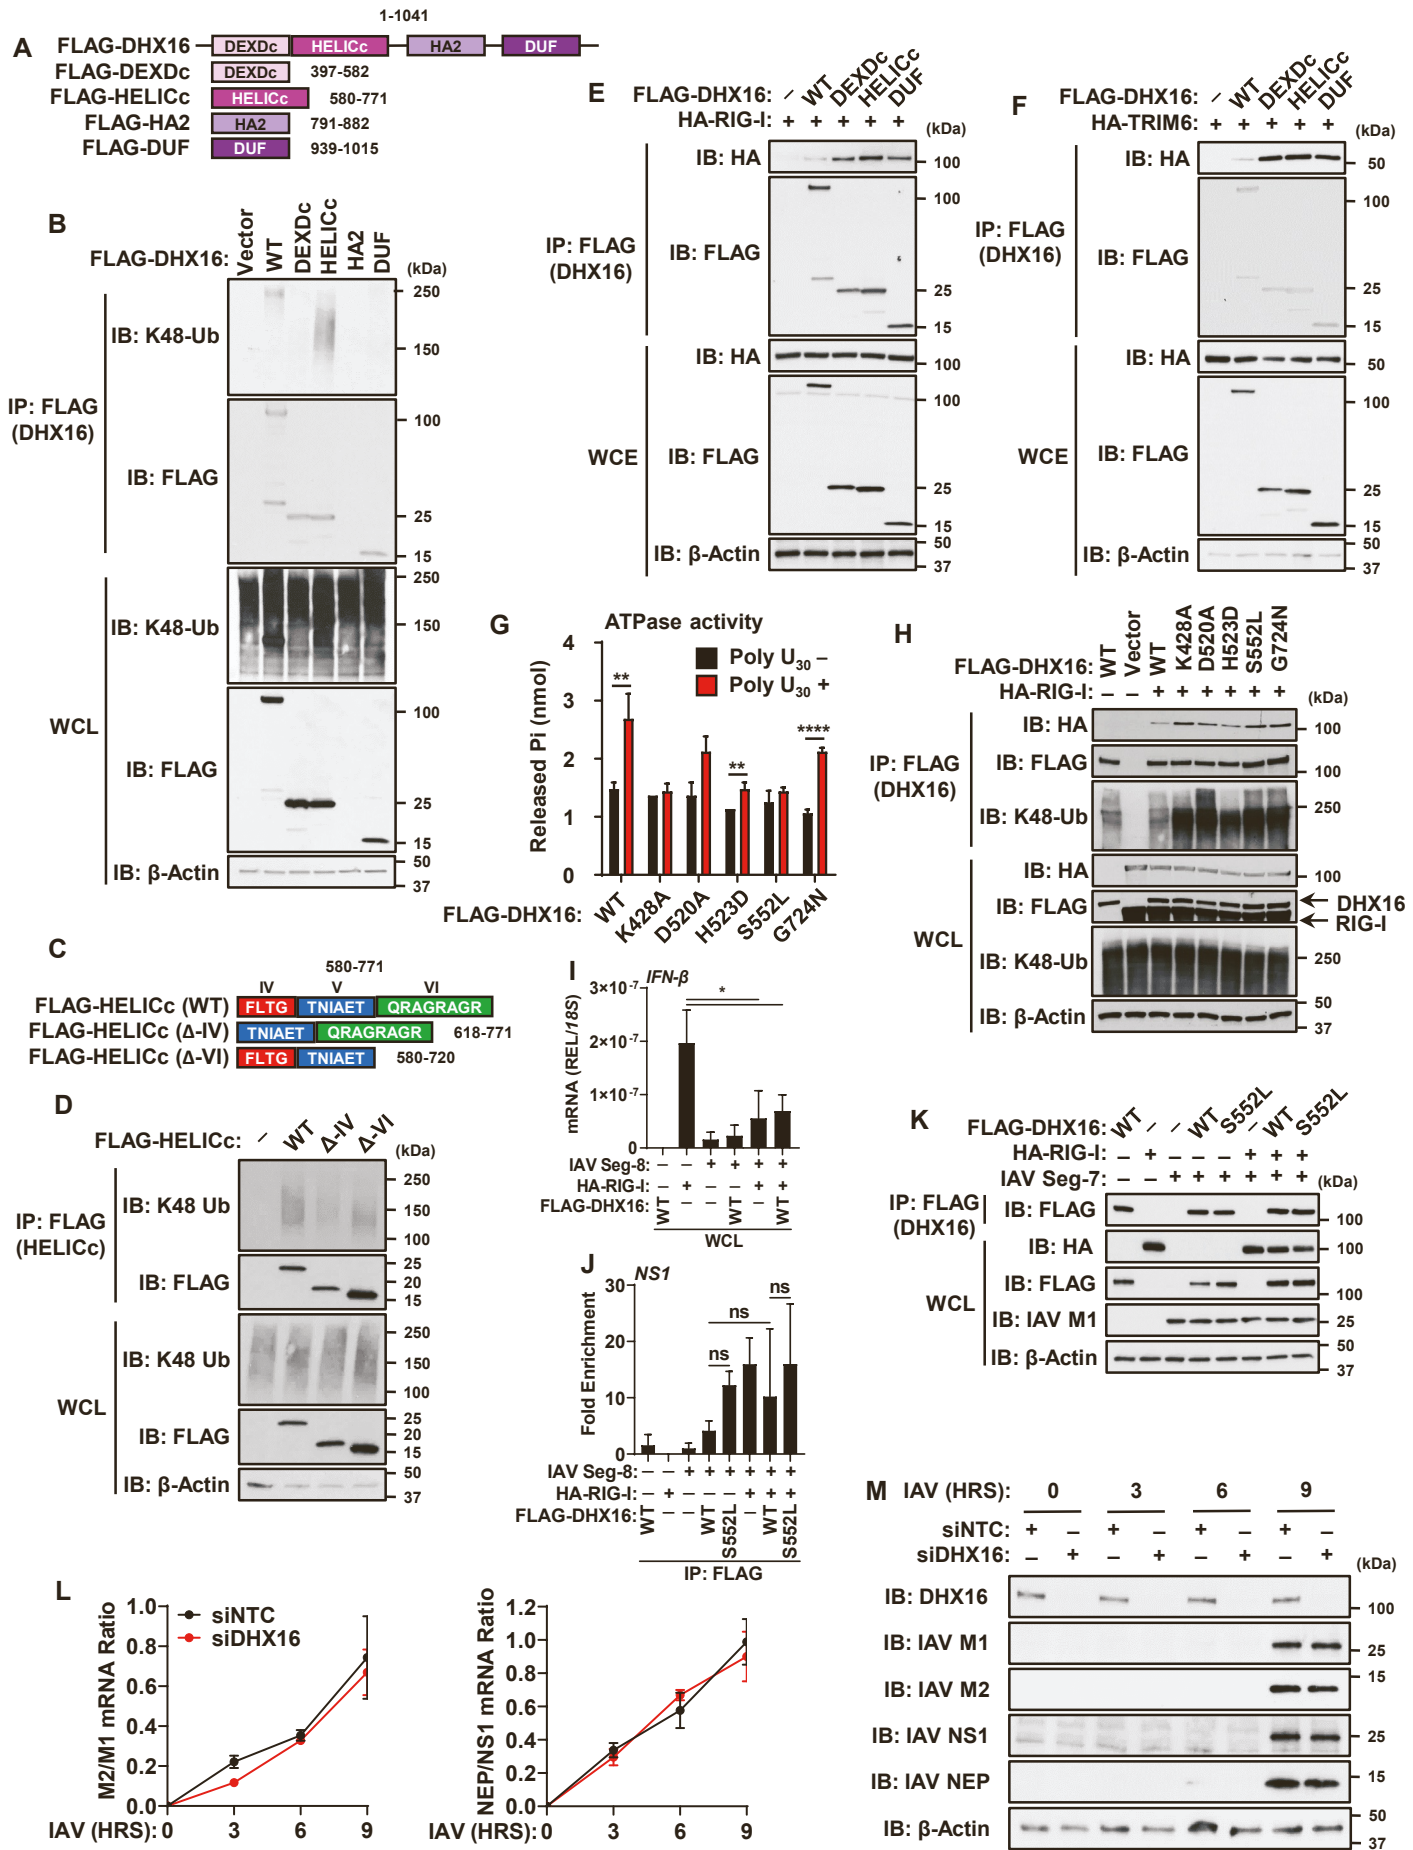

**Figure S6. DHX16 knockdown does not alter splicing of IAV genes. Related to Figure 7.** (A) Diagram of DHX16 domains mutants used. (B) Interactions between DHX16 (WT and domain mutants) and K48-poly-Ub following co-expression in HEK293Ts (Co-IP). (C) Diagram of DHX16-HELICc motif mutants used. (D) Interactions between DHX16-HELICc (WT and motif mutants) and K48-poly-Ub following co-expression in HEK293Ts (Co-IP). (E and F) Interactions between DHX16 (WT and domain mutants) and RIG-I (E) or TRIM6 (F) following co-expression in HEK293Ts (Co-IP). (G) ATPase activity of DHX16 (WT or mutants) in an *in vitro* ATPase assay. (H) Interactions between DHX16 (WT and mutants) and RIG-I following co-expression in HEK293Ts (Co-IP). (I) Input *IFN-β* expression from IAV segment 8 RNA-IP (qRT-PCR). (J) Interaction between DHX16 (WT or S552L) and segment 8 of IAV in the presence or absence of RIG-I (fold enrichment over segment 8 alone) (RNA-IP). (K) Input protein expression from RNA-IP using IAV segments (immunoblot). (L) *M2/M1* and *NEP/NS1* expression from siNTC or siDHX16 treated A549s infected with IAV (PR8 MOI=1) (qRT-PCR). (M) Expression of IAV proteins from siNTC or siDHX16 treated A549s infected with IAV (PR8 MOI=1) (immunoblot). Data are expressed as means (n=3) SD \*p < 0.05; \*\*p < 0.01; \*\*\*\*p < 0.0001 (Student's t-test or one-way ANOVA with Tukey's multiple comparisons). Data are representative of 2-3 independent experiments.

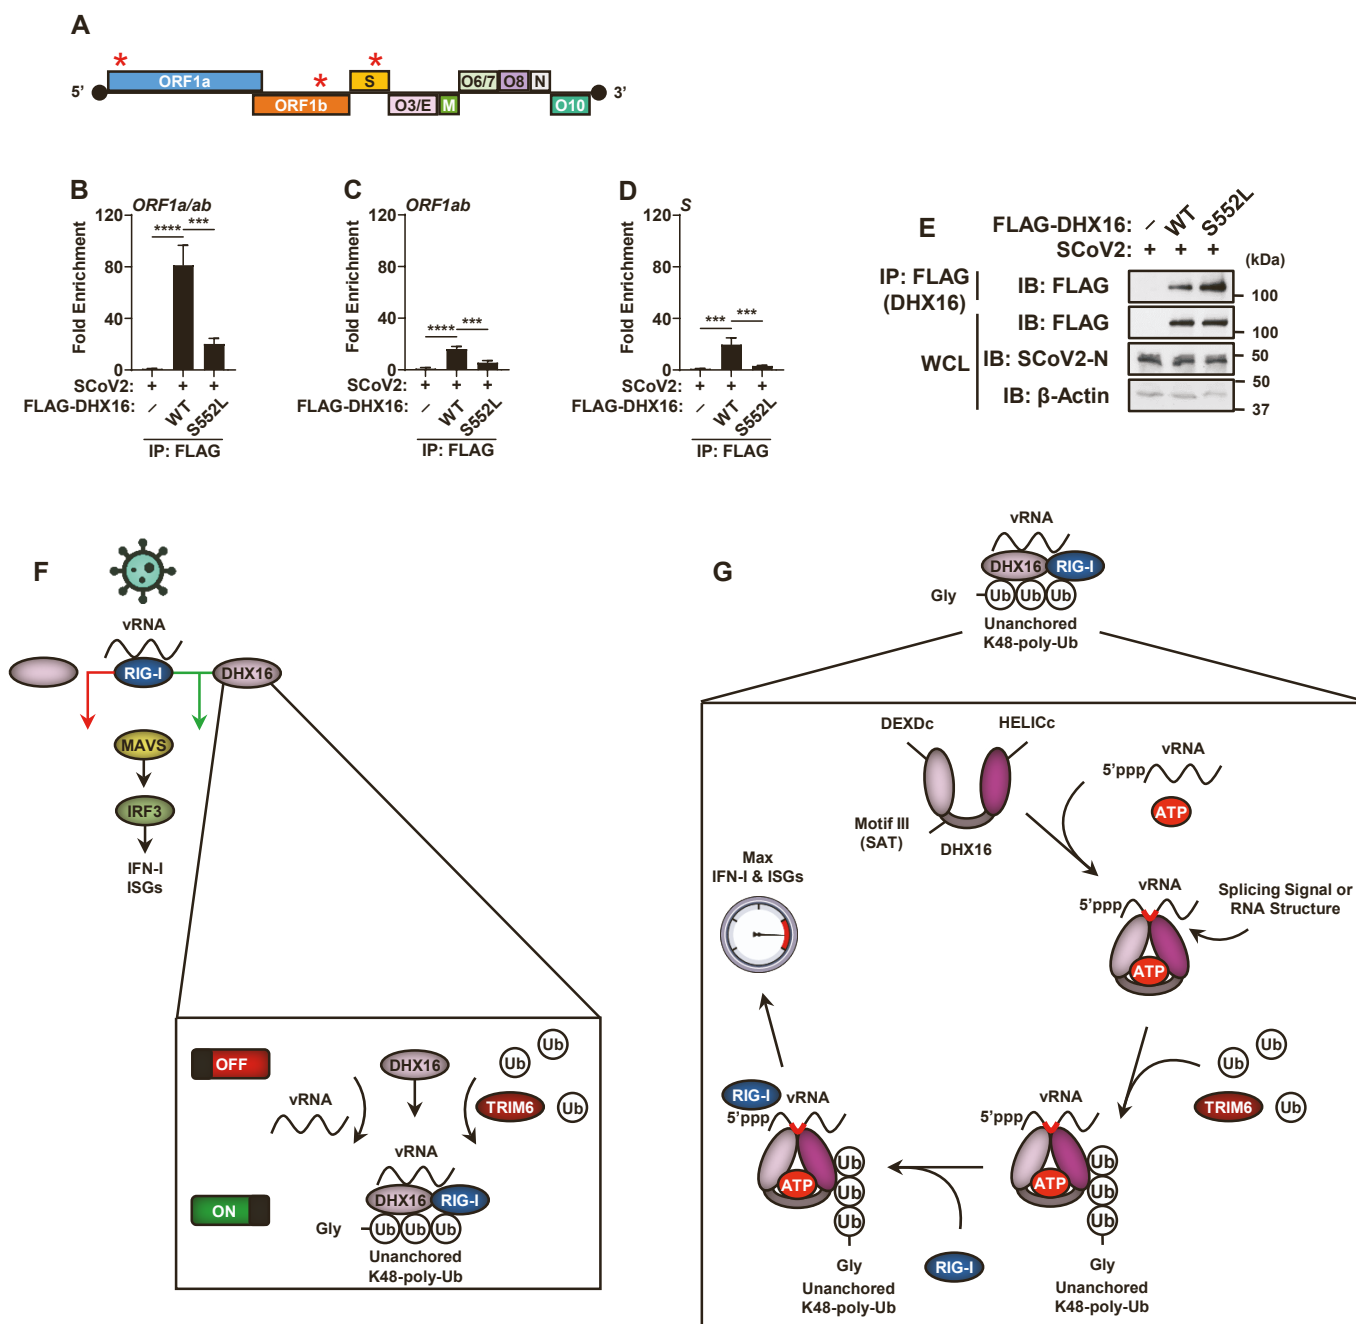

**Figure S7. DHX16 enhances IFN-I production in response to virus infection. Related to Figure 7.** (A) Diagram of SCoV2 genome. Stars indicate amplification regions of qRT-PCR primers used. (B-D) Interaction between DHX16 (WT or S552L) and SCoV2 vRNAs from HEK293T-hACE2s infected for 24 hrs (USA-WA1/2020 MOI=0.1) (fold enrichment over SCoV2 alone) (RNA-IP). (E) Input protein expression from RNA-IP using SCoV2 (immunoblot). (F and G) Model of DHX16-dependant enhancement of antiviral innate immunity. (F) DHX16 enhances RIG-I-mediated IFN-I production in response to virus infection. Activation of DHX16 requires recognition of vRNA and interactions with unanchored K48-poly-Ub chains synthesized by TRIM6. These interactions promote the recruitment of RIG-I. (G) Sensing of vRNAs by DHX16 requires specific PAMPs (splicing signals in IAV and potentially RNA structures or Poly U sequences for other viruses). This recognition requires an intact motif III (SAT) which utilizes the binding energy of ATP to alter the conformation of the helicase domain into a high-affinity RNA clamp. Upon engagement with an RNA substrate, K48-poly-Ub chains synthesized by TRIM6 associate with DHX16's HELICc domain. The presence of these unanchored Ub chains facilitate interactions with RIG-I, which is required for the DHX16-dependent enhancement of downstream IFN-I signaling and optimal antiviral innate immunity. Data are expressed as means (n=3) SD \*\*\*p < 0.01; \*\*\*\*p < 0.0001 (One-way ANOVA with Tukey's multiple comparisons). Data are representative of 2-3 independent experiments.

**SUPPLEMENTAL TABLES**

**Table S1: Primer sequences to generate mutations and fusion constructs for DHX16, related to STAR Methods.**

| CONSTRUCT                               | FORWARD                                                                                              | REVERSE                                                                                                |
|-----------------------------------------|------------------------------------------------------------------------------------------------------|--------------------------------------------------------------------------------------------------------|
| Oligonucleotides for cloning constructs |                                                                                                      |                                                                                                        |
| HA-DHX16                                | 5'-<br>ATAATAGAATTCATG<br>GCGACGCCGGCGG<br>GTCTGGAGCGCTGG<br>GTTTCAGGACGAGCT<br>GCACTCGGTGTTG-<br>3' | 5'-<br>TAATATCTCGAGTT<br>AGTAATCTGGAAC<br>ATCGTATGGGTAC<br>ATTGCTGCTGCC<br>CTAGCTCTTCTCG<br>TGTTTTG-3' |
| FLAG-DHX16 (K428A)                      | 5'-<br>AGACAGGCTCAGGG<br>GCGACCACCCAGAT<br>-3'                                                       | 5'-<br>ATCTGGGTGGTCG<br>CCCCTGAGCCTGT<br>CT-3'                                                         |
| FLAG-DHX16 (D520A)                      | 5'-<br>CGTGGTGATGGTGG<br>CAGAGGCACACGAA<br>A-3'                                                      | 5'-<br>TTTCGTGTGCCTC<br>TGCCACCATCACC<br>ACG-3'                                                        |
| FLAG-DHX16 (H523D)                      | 5'-<br>TGGTGGATGAGGCA<br>GATGAAAGGACCCT<br>ACACACAGA-3'                                              | 5'-<br>TCTGTGTGTAGGG<br>TCCTTTCATCTGC<br>CTCATCCACCA-3'                                                |
| FLAG-DHX16 (S552L)                      | 5'-<br>TCAAGGTCCTGGTG<br>GCTTTAGCCACAAT<br>GGACACT-3'                                                | 5'-<br>AGTGTCCATTGTG<br>GCTAAAGCCACCA<br>GGACCTTGA-3'                                                  |
| FLAG-DHX16 (G724N)                      | 5'-<br>ATTAGAATTCGTCTGA<br>CTGGATCCGGTACC<br>GAGGAGATCT-3'                                           | 5'-<br>TAATGTATACAGG<br>CGGAAGCACTTCC<br>CTGCAGCCACCCG<br>ACCTGCCCTGTTA<br>GCTCGCTGAT-3'               |
| FLAG-DHX16 (DEXDc)                      | 5'-<br>ATTAGCGATCGCCA<br>TGAGCCTCCCGGTG<br>TTC-3'                                                    | 5'-<br>TAATACGCGTGAA<br>GATGTCCACAGGA<br>AACCT-3'                                                      |
| FLAG-DHX16 (HELICc)                     | 5'-<br>ATTAGCGATCGCCA<br>TGGACATCTTCTACA<br>-3'                                                      | 5'-<br>TAATACGCGTCCC<br>TAAGCTCTTGAGC<br>AGCAACA-3'                                                    |
| FLAG-DHX16 (HA2)                        | 5'-<br>ATTAGCGATCGCCA<br>TGCTGGCTTTGGAG<br>CAGCTGTAT-3'                                              | 5'-<br>TAATACGCGTTAG<br>CAGAACCAGGTGG<br>TCA-3'                                                        |

|                          |                                                            |                                                     |
|--------------------------|------------------------------------------------------------|-----------------------------------------------------|
| FLAG-DHX16 (DUF)         | 5'-<br>ATTAGCGATCGCCA<br>TGGTACGCAAGGCC<br>ATCACT-3'       | 5'-<br>TAATACGCGTATA<br>ATGGGGAGCCAC<br>CTCCAGAA-3' |
| FLAG-DHX16 (HELICc Δ-IV) | 5'-<br>ATTAGCGATCGCCA<br>TGCCCATTTATGCC<br>AATCTGCCCTCT-3' | 5'-<br>TAATACGCGTCCC<br>TAAGCTCTTGAGC<br>AGCAACA-3' |
| FLAG-DHX16 (HELICc Δ-VI) | 5'-<br>ATTAGCGATCGCCA<br>TGGACATCTTCTACA<br>-3'            | 5'-<br>TAATACGCGTGCT<br>CTTCTGCTTACAG<br>AACCT-3'   |

**Table S2: Primer sequences to determine mRNA transcript levels, related to STAR Methods.**

| REAGENT or RESOURCE          | FORWARD                              | REVERSE                              |
|------------------------------|--------------------------------------|--------------------------------------|
| Oligonucleotides for qRT-PCR |                                      |                                      |
| <i>h18S rRNA</i>             | 5'-<br>GTAACCCGTTGAAC<br>CCCATT-3'   | 5'-<br>CCATCCAATCGGT<br>AGTAGCG-3'   |
| <i>hDHX16</i>                | 5'-<br>CCAACCTGCTCTCAA<br>TCTCCA-3'  | 5'-<br>ATCCCAACTCCTC<br>CCTCTTT-3'   |
| <i>hIFN-β</i>                | 5'-<br>TCTGGCACAACAGG<br>TAGTAGGC-3' | 5'-<br>GAGAAGCACAACA<br>GGAGAGCAA-3' |
| <i>hIFIT1</i>                | 5'-<br>CAAAGGGCAAACG<br>AGGCAG-3'    | 5'-<br>CCCAGGCATAGTT<br>TCCCCAG-3'   |
| <i>hIFITM1</i>               | 5'-<br>TGACCATTGGATTC<br>ATCCTG-3'   | 5'-<br>TGCACAGTGGAGT<br>GCAAAG-3'    |
| <i>hIFIT2</i>                | 5'-<br>ATGTGCAACCTACT<br>GGCCTAT-3'  | 5'-<br>TGAGAGTCGGCCC<br>ATGTGATA-3'  |
| <i>hIFI27</i>                | 5'-<br>ACTGGGAGCAACTG<br>GACTCT-3'   | 5'-<br>TAGAACCTCGCAA<br>TGACAGC-3'   |
| <i>hMX2</i>                  | 5'-<br>AGGTTCCAGACCTG<br>ACCATC-3'   | 5'-<br>GTCTGCTGCCTCT<br>GGATGTA-3'   |
| <i>hBST2</i>                 | 5'-<br>GAAAGTGGAGGAGC<br>TTGAGG-3'   | 5'-<br>ACTTCTTGCCGC<br>GATTCTC-3'    |
| <i>hISG15</i>                | 5'-<br>TCCTGGTGAGGAAT<br>ACAAGGG-3'  | 5'-<br>GTCAGCCAGAACA<br>GGTCGTC-3'   |

|                       |                                         |                                              |
|-----------------------|-----------------------------------------|----------------------------------------------|
| <i>hSTAT1</i>         | 5'-<br>ACAGCAGAGCGCCT<br>GTATTG-3'      | 5'-<br>CAGCTGATCCAAG<br>CAAGCAT-3'           |
| <i>mβ-Actin</i>       | 5'-<br>CGGTTCCGATGCC<br>TGAGGCTCTT-3'   | 5'-<br>CGTCACACTTCAT<br>GATGGAATTGA-3'       |
| <i>mIFN-β</i>         | 5'-<br>CAGCTCCAAGAAAG<br>GACGAAC-3'     | 5'-<br>GGCAGTGTAAC<br>TTCTGCAT-3'            |
| <i>mIFITM1</i>        | OriGene<br>Cat #MP206689                | OriGene<br>Cat #MP206689                     |
| <i>IAV NP</i>         | 5'-<br>GCCTGCCTGCCTGT<br>GTGTATGGAT-3'  | 5'-<br>GGCATGCCATCCA<br>CACCAGTTGAC-3'       |
| <i>IAV M1</i>         | 5'-<br>AGATGAGTCTTCTAA<br>CCGAGTCG-3'   | 5'-<br>TGCAAAAACATCT<br>TCAAGTCTCT-3'        |
| <i>IAV M2</i>         | 5'-<br>CCGAGGTCGAAACG<br>CCTATCAG-3'    | 5'-<br>GCAATAGTGAGAG<br>GATCACTTGAAC-3'      |
| <i>IAV NS1</i>        | 5'-<br>GATCCAAACACTGT<br>GTCAAGCTTTC-3' | 5'-<br>ATCCGCTCCACTA<br>TCTGCTT-3'           |
| <i>IAV NEP</i>        | 5'-<br>GGGTGACAAAGACA<br>TAATGG-3'      | 5'-<br>TCTCCCATTCTCAT<br>TACTGC-3'           |
| <i>SCoV2 ORF1a/ab</i> | 5'-<br>AGTTACGGCGCCGA<br>TCTAAAGTCAT-3' | 5'-<br>TAGCCATCAGGGC<br>CACAGAAGTT-3'        |
| <i>SCoV2 ORF1ab</i>   | 5'-<br>TACGTGCATGGATT<br>GGCTTCGAT-3'   | 5'-<br>GTTTAAATTGATCT<br>CCAGGCGGTGGT-<br>3' |
| <i>SCoV2 S</i>        | 5'-<br>GCCTTACTGTTTTGC<br>CACCT-3'      | 5'-<br>TGATTGTACCCGC<br>TAACAGTGC-3'         |
